# Supplementary material for: A green and efficient strategy to utilize spent SCR catalyst carriers: in situ remediation of Cu@TiO2 for photocatalytic hydrogen evolution
Source: Royal Society of Chemistry journal article supplement (doi:10.1039/d4gc04806g), 2024-11-26
Supplement: d4gc04806g1.pdf [file d4gc04806g1.pdf]

**A green and efficient strategy to utilize spent SCR catalyst carrier: in-situ remediation of Cu@TiO<sub>2</sub> for photocatalytic hydrogen evolution**

*Zhuo Wang<sup>a</sup>, Ling Ma<sup>a</sup>, Bingzhang Chen<sup>a</sup>, Yubo Zhang<sup>a</sup>, Kai Hong Wong<sup>b</sup>, Wei Zhao<sup>c</sup>, Chunxia Wang<sup>a,\*</sup>, Guoyong Huang<sup>a,\*</sup>, Shengming Xu<sup>d</sup>*

<sup>a</sup> State Key Laboratory of Heavy Oil Processing, College of New Energy and Materials, China University of Petroleum (Beijing), Beijing 102249, China.

<sup>b</sup> State Key Laboratory of Urban Water Resource and Environment, Harbin Institute of Technology, Harbin 150090, P. R. China.

<sup>c</sup> Green Living and Innovation Division, Hong Kong Productivity Council, HKPC Building, 78, Tat Chee Avenue, Kowloon 999077, Hong Kong.

<sup>d</sup> Beijing Key Lab of Fine Ceramics, Institute of Nuclear and New Energy Technology, Tsinghua University, Beijing, 100084, China.

\*Corresponding authors: E-mail: cxwang@iccas.ac.cn; huanggy@cup.edu.cn.

**Table S1** Content of each element in the original SCR catalyst before recycling treatment

| ICP-OES              |                  |                                |                  |                 |                               |                                |       |       |
|----------------------|------------------|--------------------------------|------------------|-----------------|-------------------------------|--------------------------------|-------|-------|
| element              | Ti               | Al                             | Si               | W               | V                             | Fe                             | Ca    | -     |
| content              | 42.49%           | 2.15%                          | 5.78%            | 2.21%           | 0.10%                         | 0.08%                          | 0.77% | -     |
| Corresponding oxides | TiO <sub>2</sub> | Al <sub>2</sub> O <sub>3</sub> | SiO <sub>2</sub> | WO <sub>3</sub> | V <sub>2</sub> O <sub>5</sub> | Fe <sub>2</sub> O <sub>3</sub> | CaO   | Other |
| content              | 70.92%           | 8.12%                          | 12.40%           | 2.79%           | 0.36%                         | 0.23%                          | 1.08% | 4.10% |

**Table S2** Elemental content of spent SCR catalysts after recycling treatment

| ICP-OES                 |                  |                                |                  |                 |                               |                                |       |       |
|-------------------------|------------------|--------------------------------|------------------|-----------------|-------------------------------|--------------------------------|-------|-------|
| element                 | Ti               | Al                             | Si               | W               | V                             | Fe                             | Ca    | -     |
| content                 | 57.55%           | 0.96%                          | 0.14%            | 0.25%           | 0.05%                         | 0.06%                          | 0.06% | -     |
| Corresponding<br>oxides | TiO <sub>2</sub> | Al <sub>2</sub> O <sub>3</sub> | SiO <sub>2</sub> | WO <sub>3</sub> | V <sub>2</sub> O <sub>5</sub> | Fe <sub>2</sub> O <sub>3</sub> | CaO   | Other |
| content                 | 96.07%           | 3.61%                          | 0.30%            | 0.31%           | 0.19%                         | 0.18%                          | 0.09% | -     |

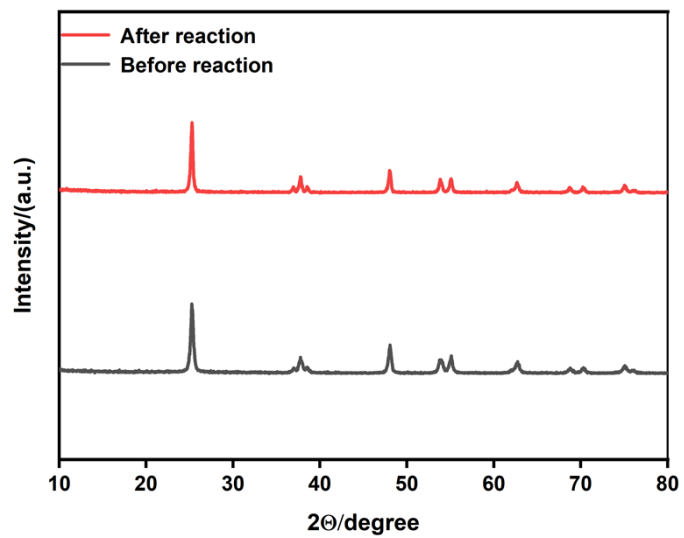

**Fig. S1.** XRD comparison of samples before and after photocatalytic hydrogen production reaction

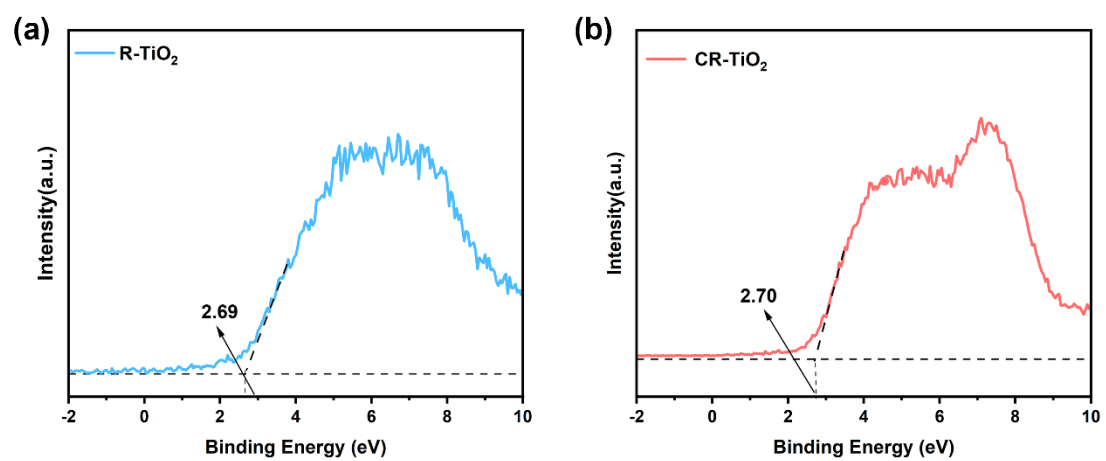

**Fig. S2.** XPS valence-band spectra of TiO<sub>2</sub>, (b) and Cu-TiO<sub>2</sub>

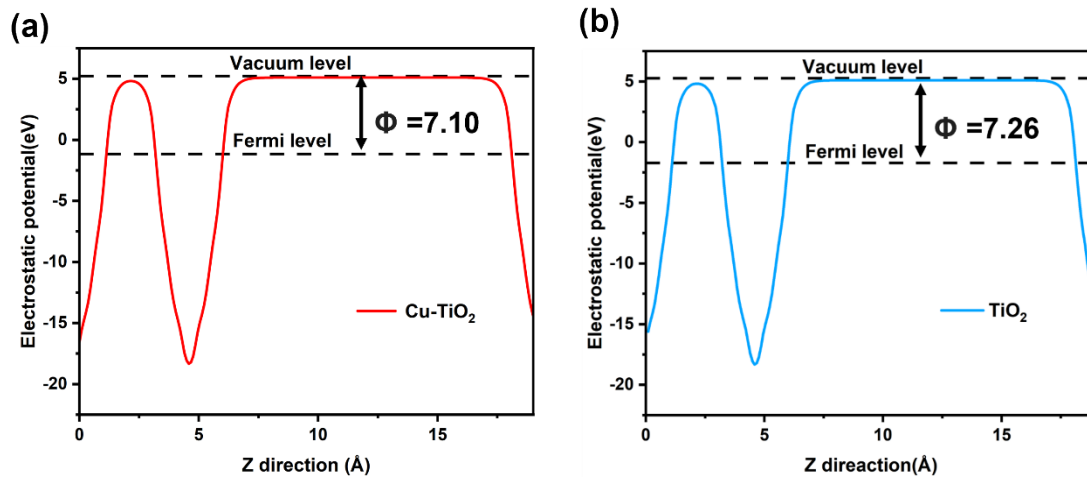

Fig. S3. Workfunction of Cu-TiO<sub>2</sub> and TiO<sub>2</sub>

**Table S3 Content of different types of oxygen in XPS analysis.**

| <b>catalyst</b>           | <b>O1</b> | <b>O2</b> | <b>O3</b> |
|---------------------------|-----------|-----------|-----------|
| <b>Cu-TiO<sub>2</sub></b> | 79.98%    | 14.26%    | 5.76 %    |
| <b>TiO<sub>2</sub></b>    | 81.40%    | 8.29 %    | 10.31%    |

**Table S4.** A comparison of g-C<sub>3</sub>N<sub>4</sub>-based photocatalysts for hydrogen production.

| Photocatalysts                                                         | Light sources                               | Sacrificial agents                 | HER rates<br>( $\mu\text{mol h}^{-1} \text{g}^{-1}$ ) | Refs.            |
|------------------------------------------------------------------------|---------------------------------------------|------------------------------------|-------------------------------------------------------|------------------|
| Cu-TiO <sub>2</sub><br>(Recovery)                                      | 300 W Xe lamp                               | 20% (vol.)<br>TEOA solution        | 368                                                   | <b>This work</b> |
| Ni-7.5@TCN                                                             | 300 W Xe lamp<br>$\lambda > 365 \text{ nm}$ | 10% (vol.)<br>TEOA                 | 134                                                   | [1]              |
| Pt@N-g-C <sub>3</sub> N <sub>4</sub>                                   | 300 W Xe lamp<br>$\lambda > 420 \text{ nm}$ | 10% (vol.)<br>TEOA                 | 64                                                    | [2]              |
| Pt/AgNbO <sub>3</sub> /g-C <sub>3</sub> N <sub>4</sub>                 | 300 W Xe lamp<br>$\lambda > 420 \text{ nm}$ | 20 % (vol.)<br>CH <sub>3</sub> OH  | 88                                                    | [3]              |
| TiO <sub>2</sub> /g-C <sub>3</sub> N <sub>4</sub>                      | 420 W Xe lamp<br>$\lambda > 300 \text{ nm}$ | 10 % (vol.)<br>CH <sub>3</sub> OH  | 36.4                                                  | [4]              |
| NiO/g-C <sub>3</sub> N <sub>4</sub>                                    | 420 W Xe lamp<br>$\lambda > 365 \text{ nm}$ | 10% (vol.)<br>TEOA                 | 68.8                                                  | [5]              |
| Pt/t-ZrO <sub>2</sub> /g-C <sub>3</sub> N <sub>4</sub>                 | 300 W Xe lamp<br>$\lambda > 420 \text{ nm}$ | 10% (vol.)<br>TEOA                 | 261                                                   | [6]              |
| Cd <sub>x</sub> Zn <sub>1-x</sub> S/Au/g-C <sub>3</sub> N <sub>4</sub> | 300 W Xe lamp<br>$\lambda > 420 \text{ nm}$ | 0.1 mol L <sup>-1</sup><br>glucose | 123.2                                                 | [7]              |
| WS <sub>2</sub> /g-C <sub>3</sub> N <sub>4</sub>                       | 300 W Xe lamp                               | 20% (vol.)<br>TEOA                 | 154                                                   | [8]              |

## Reference

[1] *Journal of Materials Science & Technology*. **2024**, 175, 3, 104-114.

[2] *Carbon*. **2016**, 99, 111–117.

[3] *J. Colloid Interface Sci.* **2019**, 534, 163–171.

[4] *Int. J. Hydrog. Energy*. **2017**, 42, 6738–6745.



- [5] *Appl. Catal. B.* **2018**, 222, 35–43.
- [6] *Appl. Catal. B.* **2019**, 251, 305–312.
- [7] *Sci. Bull.* **2017**, 62, 602–609.
- [8] *Int. J. Hydrog. Energy.* **2019**, 44, 14927–14937.
